# Supplementary material for: A Genome-Scale Integration and Analysis of Lactococcus lactis Translation Data
Source: PubMed Central journal article supplement (PMC3794899; doi:10.1371/journal.pcbi.1003240), 2013-10-10

Batch culture of *L. lactis*

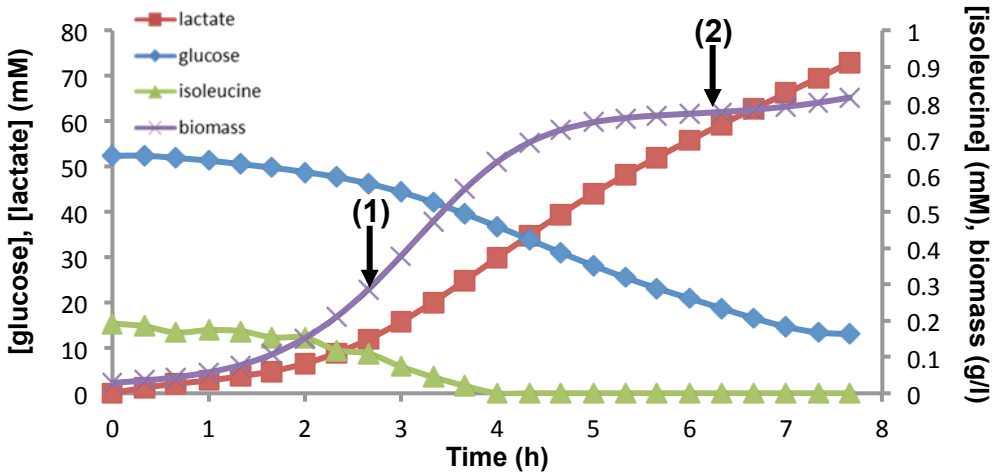

| Sampling condition                | Growth rate (h <sup>-1</sup> ) | q <sub>glucose</sub> (mmol.g <sup>-1</sup> .h <sup>-1</sup> ) | n <sub>lactate</sub> (mmol.g <sup>-1</sup> .h <sup>-1</sup> ) |
|-----------------------------------|--------------------------------|---------------------------------------------------------------|---------------------------------------------------------------|
| (1) normal                        | 0.88                           | 22 ± 3                                                        | 42 ± 2                                                        |
| (2) stress : isoleucine depletion | 0.05                           | 7 ± 1                                                         | 15 ± 1                                                        |

Translation arrest with chloramphenicol and sampling

Size separation of ribosome-mRNA complexes according to ribosome number

(Example of a polysomal profile in normal condition (1))

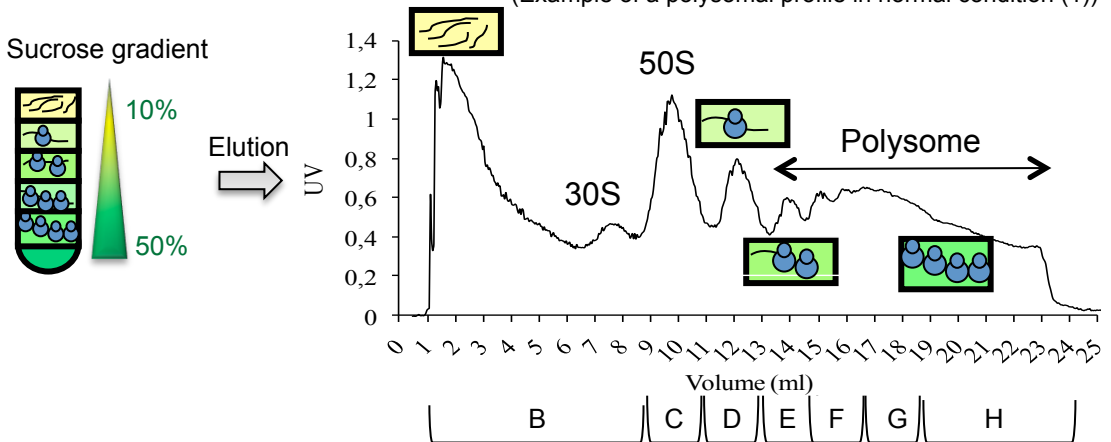

Quantification of mRNA levels in each fraction by microarrays

Statistical data processing

Determination of the number of ribosomes bound to each mRNA molecules

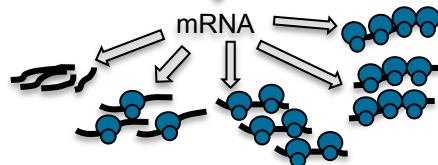

Supplement: pcbi.1003240.s001.pdf [file pcbi.1003240.s001.pdf]
