# Supplementary material for: A Genome-Scale Integration and Analysis of Lactococcus lactis Translation Data
Source: PubMed Central journal article supplement (PMC3794899; doi:10.1371/journal.pcbi.1003240), 2013-10-10

A

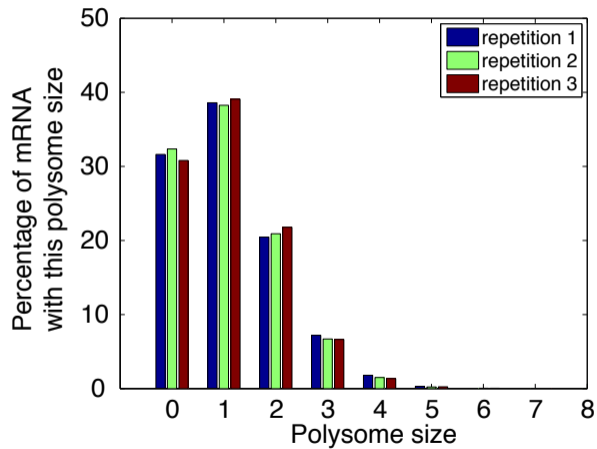

B

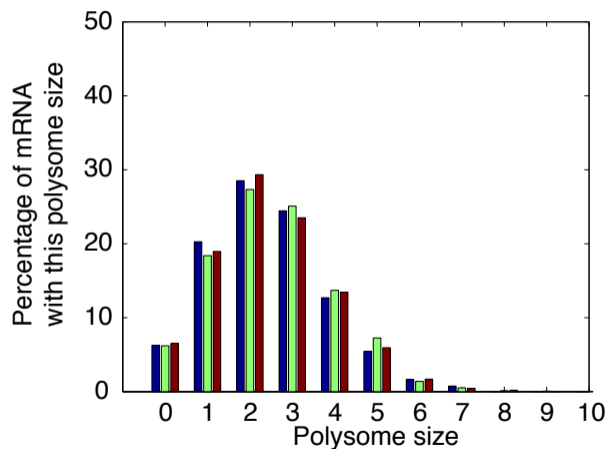

C

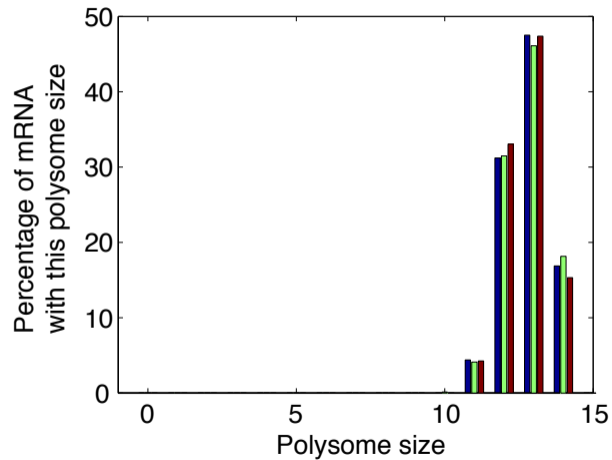

Supplement: pcbi.1003240.s008.pdf [file pcbi.1003240.s008.pdf]
