# Supplementary material for: A Genome-Scale Integration and Analysis of Lactococcus lactis Translation Data
Source: PubMed Central journal article supplement (PMC3794899; doi:10.1371/journal.pcbi.1003240), 2013-10-10
Supplement: pcbi.1003240.s010.pdf [file pcbi.1003240.s010.pdf]

| Group | $\rho$      | $V_s [s^{-1}]$ | $V_{abs} [a.u.]$ | $C_{k_I}^v$ | $C_{k_E}^v$ | $C_{k_T}^v$ | $n_{in\ cluster}^{genes}$ | Functional sub-category          | $n_{per\ category}^{genes}$ |
|-------|-------------|----------------|------------------|-------------|-------------|-------------|---------------------------|----------------------------------|-----------------------------|
| I     | 0.0 - 0.2   | 0.02 - 0.44    | 0.0 - 46.6       | 0.8 - 1.0   | 0 - 0.2     | 0           | 788/1108                  | REGgen ( $p=2.8 \cdot 10^{-2}$ ) | 31/36                       |
|       |             |                |                  |             |             |             |                           | NRJsug ( $p=3.1 \cdot 10^{-2}$ ) | 15/16                       |
|       |             |                |                  |             |             |             |                           | CELcom ( $p=9.1 \cdot 10^{-2}$ ) | 7/7                         |
|       |             |                |                  |             |             |             |                           | NRJfer ( $p=9.1 \cdot 10^{-2}$ ) | 7/7                         |
| II    | 0.2 - 0.4   | 0.44 - 0.82    | 1.4 - 52.5       | 0.6 - 0.8   | 0.2 - 0.4   | 0           | 202/1108                  | TRDdeg ( $p=9.7 \cdot 10^{-2}$ ) | 11/12                       |
|       |             |                |                  |             |             |             |                           | TSPani ( $p=2.9 \cdot 10^{-3}$ ) | 5/7                         |
|       |             |                |                  |             |             |             |                           | PURpyr ( $p=7.0 \cdot 10^{-3}$ ) | 6/11                        |
|       |             |                |                  |             |             |             |                           | PURsal ( $p=7.0 \cdot 10^{-3}$ ) | 6/11                        |
| III   | 0.4 - 0.5   | 0.82 - 1.10    | 2.9 - 36.6       | 0.4 - 0.6   | 0.4 - 0.6   | 0           | 53/1108                   | COFhem ( $p=3.3 \cdot 10^{-2}$ ) | 2/2                         |
|       |             |                |                  |             |             |             |                           | TRDsyn ( $p=5.1 \cdot 10^{-2}$ ) | 15/54                       |
|       |             |                |                  |             |             |             |                           | TSPami ( $p=5.5 \cdot 10^{-2}$ ) | 7/20                        |
|       |             |                |                  |             |             |             |                           | REGdeo ( $p=8.7 \cdot 10^{-2}$ ) | 2/3                         |
| IV    | 0.53 - 0.64 | 1.11 - 1.28    | 4.2 - 76.3       | 0.2 - 0.4   | 0.6 - 0.8   | 0           | 19/1108                   | UNK ( $p=3.9 \cdot 10^{-3}$ )    | 28/383                      |
|       |             |                |                  |             |             |             |                           | NRJatp ( $p=2.0 \cdot 10^{-2}$ ) | 2/5                         |
| V     | 0.64 - 0.85 | 1.28 - 1.37    | 3.1 - 121.6      | 0 - 0.2     | 0.8 - 1.0   | 0 - 0.2     | 41/1108                   | TRDfac ( $p=7.3 \cdot 10^{-3}$ ) | 2/8                         |
|       |             |                |                  |             |             |             |                           | TRDsyn ( $p=6.1 \cdot 10^{-2}$ ) | 3/54                        |
| VI    | 0.87 - 1.00 | 0.67 - 1.28    | 3.9 - 35.2       | 0           | 0 - 0.8     | 0.2 - 1     | 5/1108                    | UNK ( $p=7.9 \cdot 10^{-2}$ )    | 10/383                      |
|       |             |                |                  |             |             |             |                           | OTHpha ( $p=7.5 \cdot 10^{-7}$ ) | 14/87                       |
|       |             |                |                  |             |             |             |                           | TRDsyn ( $p=2.7 \cdot 10^{-3}$ ) | 7/54                        |
|       |             |                |                  |             |             |             |                           | UNK ( $p=5.1 \cdot 10^{-2}$ )    | 4/383                       |

**Table S1: Enrichment of functional sub-categories for genes grouped by similar translational control.** See Table 1 for a description, where here we look for terms of functional sub-categories.

CELcom: cellular processes, transformation; COFhem: heme and porphyrin; NRJatp: ATP-proton motive force

interconversion; NRJsug: sugars; OTHpha: phage related functions and prophages; PURpyr: pyrimidine ribonucleotide biosynthesis; PURsal: salvage of nucleosides and nucleotides; REGdeo: deoR-family regulators; REGgen: regulatory functions, general; TRDdeg: degradation of proteins, peptides and glycopeptides; TRDfac: translation factors; TRDsyn: ribosomal proteins synthesis and modification; TSPami: amino acids, peptides and amines; TSPani: anions; UNK: unknown.
