# Supplementary material for: A Genome-Scale Integration and Analysis of Lactococcus lactis Translation Data
Source: PubMed Central journal article supplement (PMC3794899; doi:10.1371/journal.pcbi.1003240), 2013-10-10
Supplement: pcbi.1003240.s011.pdf [file pcbi.1003240.s011.pdf]

| Genes' group                      | Functional category   | $n_{\text{genes per category}}$ |
|-----------------------------------|-----------------------|---------------------------------|
| 200 genes with highest $V_{abs}$  | <b>TRD (p=1.2e-4)</b> | 32/96                           |
|                                   | ENV (p=6.0e-2)        | 12/42                           |
|                                   | UNK (p=6.7e-2)        | 79/79                           |
| 200 genes with lowest $V_{abs}$   | <b>REG (p=2.8e-3)</b> | 23/73                           |
|                                   | <b>TSP (p=1.1e-2)</b> | 28/103                          |
|                                   | <b>NRJ (p=2.7e-2)</b> | 25/96                           |
|                                   | <b>AMI (p=4.5e-2)</b> | 11/36                           |
| 200 genes with highest $V_{spec}$ | <b>OTH (p=4.9e-4)</b> | 33/107                          |
|                                   | <b>UNK (p=5.4e-4)</b> | 90/384                          |
|                                   | TRD (p=7.9e-2)        | 23/96                           |
| 200 genes with lowest $V_{spec}$  | <b>NRJ (p=1.7e-6)</b> | 36/96                           |
|                                   | <b>TSP (p=5.3e-3)</b> | 29/103                          |
|                                   | <b>REG (p=2.7e-2)</b> | 20/73                           |
|                                   | <b>ENV (p=2.7e-2)</b> | 13/42                           |
|                                   | AMI (p=9.7e-2)        | 10/36                           |

**Table S2: Functional enrichment for genes with highest or lowest specific or absolute protein synthesis rate.**

AMI: amino acid biosynthesis, ENV: cell envelope, NRJ: energy metabolism, OTH: other categories, REG: regulatory functions, TRD: translation, TSP: transport and binding proteins, UNK: unknown function.
